# Supplementary material for: Clematichinenoside Serves as a Neuroprotective Agent Against Ischemic Stroke: The Synergistic Action of ERK1/2 and cPKC Pathways
Source: PubMed Central journal article supplement (PMC4709476; doi:10.3389/fncel.2015.00517), 2016-01-12
Supplement: Image1.pdf [file Image1.pdf]

## *Supplementary Material*

### **Title: Clematichinenoside serves as a neuroprotective agent against ischemic stroke: the synergistic action of ERK1/2 and cPKC pathways.**

**Running title:**

#### **Clematichinenoside ameliorates ischemic stroke**

Chao Liu<sup>1a</sup>, Qianming Du<sup>4a</sup>, Xu Zhang<sup>3</sup>, Zhichao Tang<sup>2</sup>, Hui Ji<sup>4\*</sup> Yunman Li<sup>1\*</sup>.

Chao Liu, PhD; Email: [liuchaogermany@sina.cn](mailto:liuchaogermany@sina.cn)

Qianming Du, PhD; Email: 115431832@qq.com

Xu Zhang, PhD; Email: 1826401371@qq.com

Zhichao Tang, PhD; Email: 462459172@qq.com

This study was done at China Pharmaceutical University.

1 State Key Laboratory of Natural Medicines, Department of Physiology, China Pharmaceutical University, Nanjing 210009, P. R. China

2 State Key Laboratory of Natural Medicines, Department of Pharmacochimistry, China Pharmaceutical University, Nanjing 210009, P. R. China

3 College of Clinical Medicine, Chengdu University of TCM, Chengdu 610075, P. R. China

4 State Key Laboratory of Natural Medicines, Department of Pharmacology, China Pharmaceutical University, Nanjing 210009, P. R. China

\* Correspondence author:

Hui Ji, PhD

Department of Pharmacology, School of Pharmacy, China Pharmaceutical University, Mailbox 207, Tongjiaxiang 24, Nanjing, Jiangsu 210009, P. R. China

Tel/Fax: 86-25-83271029

E-mail: [1697192728@qq.com](mailto:1697192728@qq.com)

Yunman Li, PhD

Department of Physiology, School of Pharmacy, China Pharmaceutical University, Mailbox 207, Tongjiaxiang 24, Nanjing, Jiangsu 210009, P. R. China

Tel/Fax: 86-25-83271173

E-mail: [yunmanlicpu@hotmail.com](mailto:yunmanlicpu@hotmail.com)

<sup>a</sup> These authors contributed equally to this work.

## Supplementary Figure

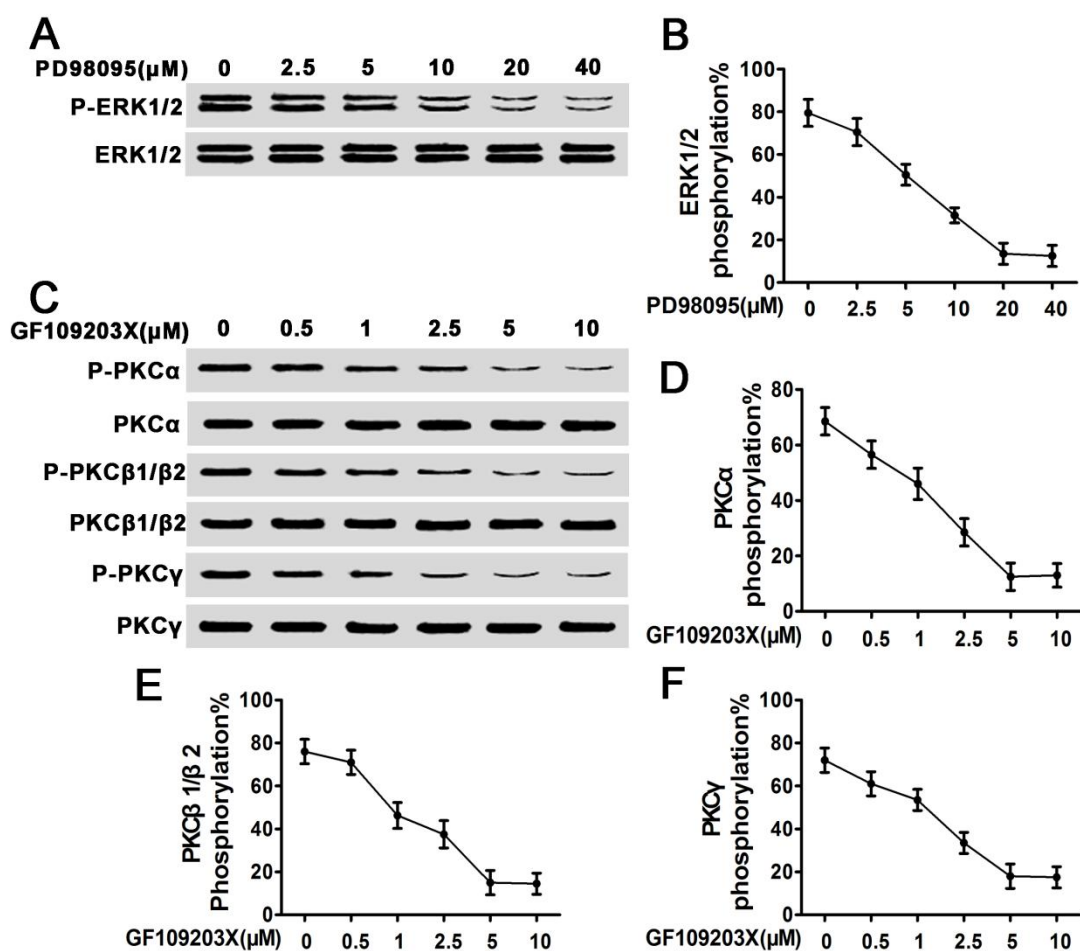

Figure S1. The inhibitive effect of PD98095 on ERK1/2 phosphorylation, and the inhibitive effect of GF109203X on cPKC (PKC $\alpha$ , PKC $\beta$ 1/ $\beta$ 2, PKC $\gamma$ ) phosphorylation in primary cortical neurons. Primary cortical neurons were treated with PD98095 or GF109203X for 2 h at the indicated concentrations and then protein phosphorylation levels or expressions were determined by western blot assay. (A) Representative results of ERK1/2 phosphorylation alterations in neurons experiencing 2 h PD98095 blocking at the indicated concentrations, and quantification data from 4 individual experiments were described in (B). (C) Representative results of cPKC (PKC $\alpha$ , PKC $\beta$ 1/ $\beta$ 2, PKC $\gamma$ ) alterations in neurons experiencing 2 h GF109203X blocking at the indicated concentrations, and quantification data from 4 individual experiments were described in (D) PKC $\alpha$ , (E) PKC $\beta$ 1/ $\beta$ 2 and (F) PKC $\gamma$ . Results mentioned-above were mean  $\pm$  SD for 4 individual experiments which, for each condition, were performed in quadruplicate.
